# Supplementary material for: Three-dimensional polyaniline architecture enabled by hydroxyl-terminated Ti3C2Tx MXene for high-performance supercapacitor electrodes
Source: Royal Society of Chemistry journal article supplement (doi:10.1039/d1qm01059j), 2021-01-01
Supplement: d1qm01059j1.pdf [file d1qm01059j1.pdf]

**Electronic Supplementary Information for**

**Three-dimensional polyaniline architecture enabled by hydroxyl-terminated  
Ti<sub>3</sub>C<sub>2</sub>T<sub>x</sub> MXene for high-performance supercapacitor electrodes**

Lin Wang\*, Yu Tan, Zhifeng Yu, Hua Tian\*, Yuannan Lai, Yunyi He, Hanqing Xiang,  
Jianwei Wang, Wenjun Zhao and Lin Zhang

Hebei Key Laboratory of Applied Chemistry, Hebei Key Laboratory of Heavy Metal  
Deep-Remediation in Water and Resource Reuse, College of Environmental and  
Chemical Engineering, Yanshan University, Qinhuangdao, 066004, China

Corresponding authors. E-mail: [chinalinkwang@126.com](mailto:chinalinkwang@126.com) (L. Wang),  
[tianhuawl@163.com](mailto:tianhuawl@163.com) (H. Tian).

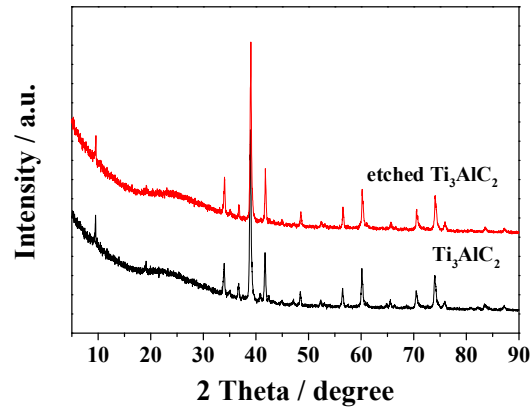

Fig. S1 XRD patterns of  $\text{Ti}_3\text{AlC}_2$  before NaOH etching processes and etched  $\text{Ti}_3\text{AlC}_2$  after NaOH etching processes.

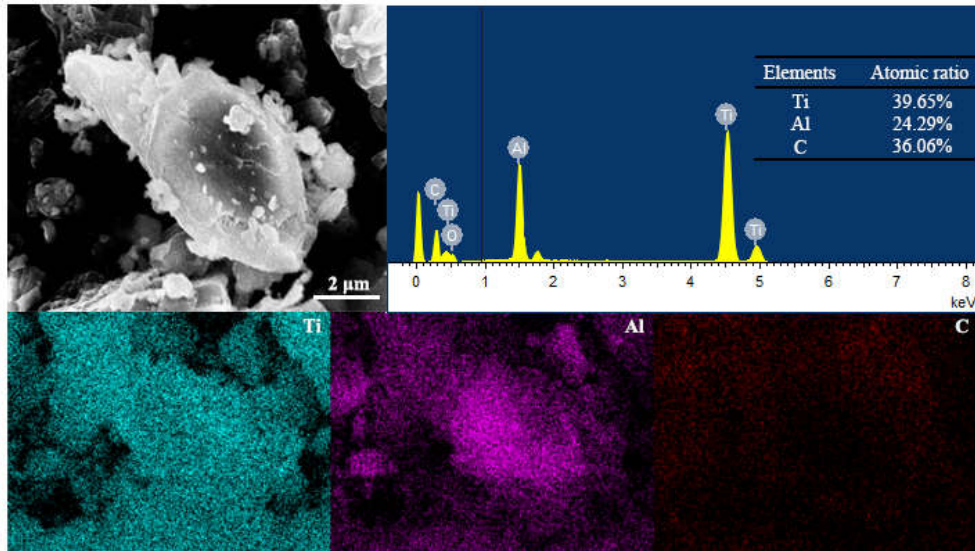

Fig. S2 SEM image, EDS spectra and element mapping distributions of  $\text{Ti}_3\text{AlC}_2$  before NaOH etching processes.

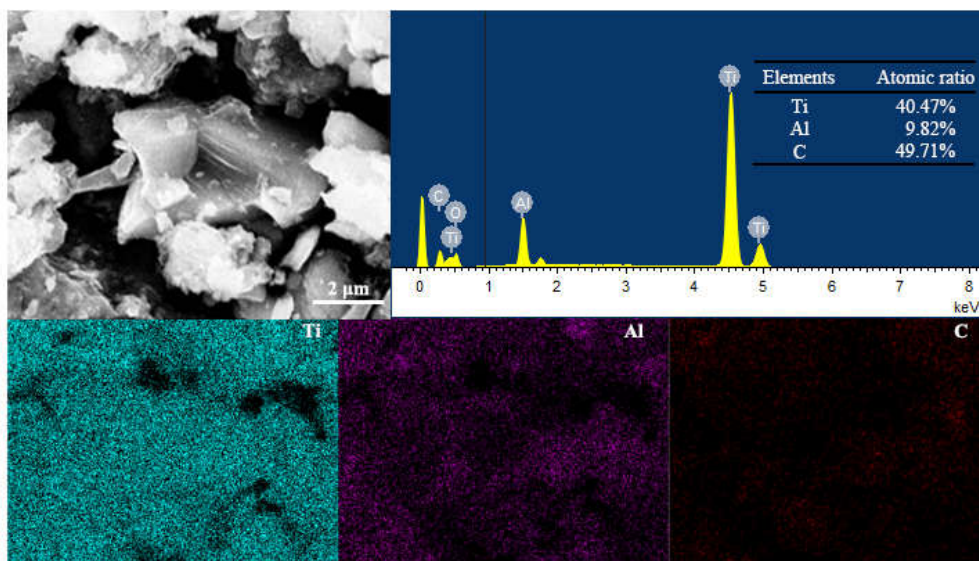

Fig. S3 SEM image, EDS spectra and element mapping distributions of etched  $\text{Ti}_3\text{AlC}_2$  after NaOH etching processes.

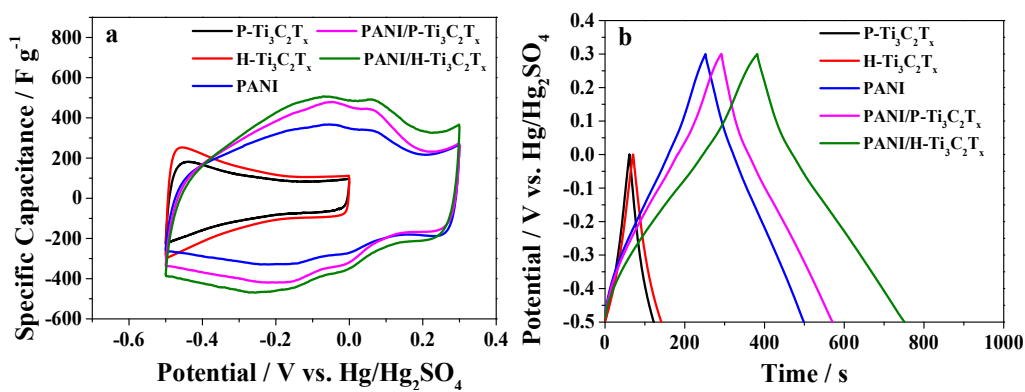

Fig. S4 Comparison of electrochemical performance for all the samples: (a) CV curves at  $10 \text{ mV s}^{-1}$ . (b) GCD curves at  $1 \text{ A g}^{-1}$ .

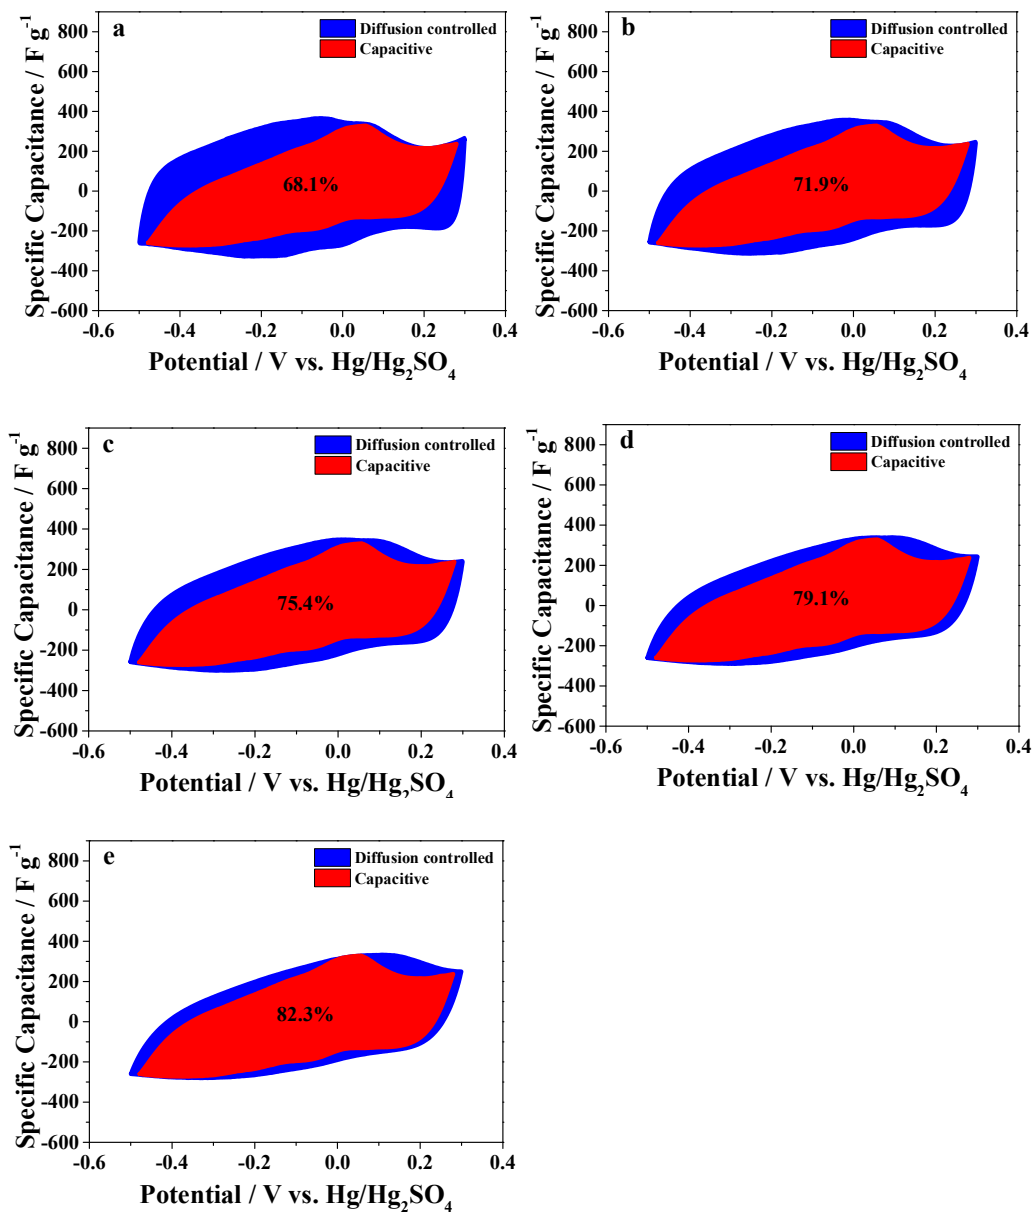

Fig. S5 The determination of capacitive contributions for PANI at (a) 10, (b) 20, (c) 30, (d) 40 and (e) 50  $mV s^{-1}$ .

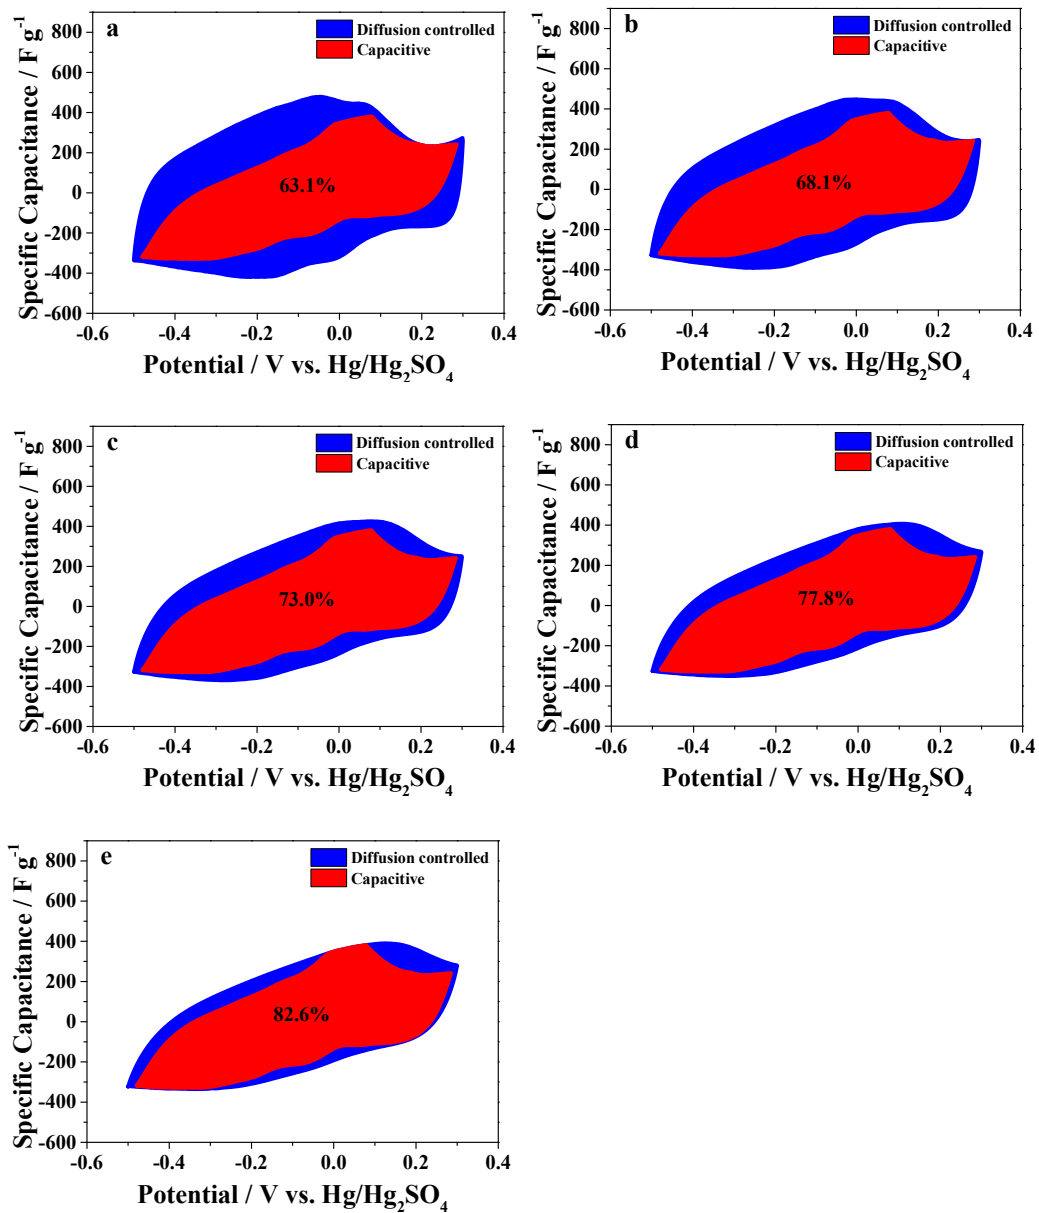

Fig. S6 The determination of capacitive contributions for PANI/P-Ti<sub>3</sub>C<sub>2</sub>T<sub>x</sub> at (a) 10, (b) 20, (c) 30, (d) 40 and (e) 50 mV s<sup>-1</sup>.

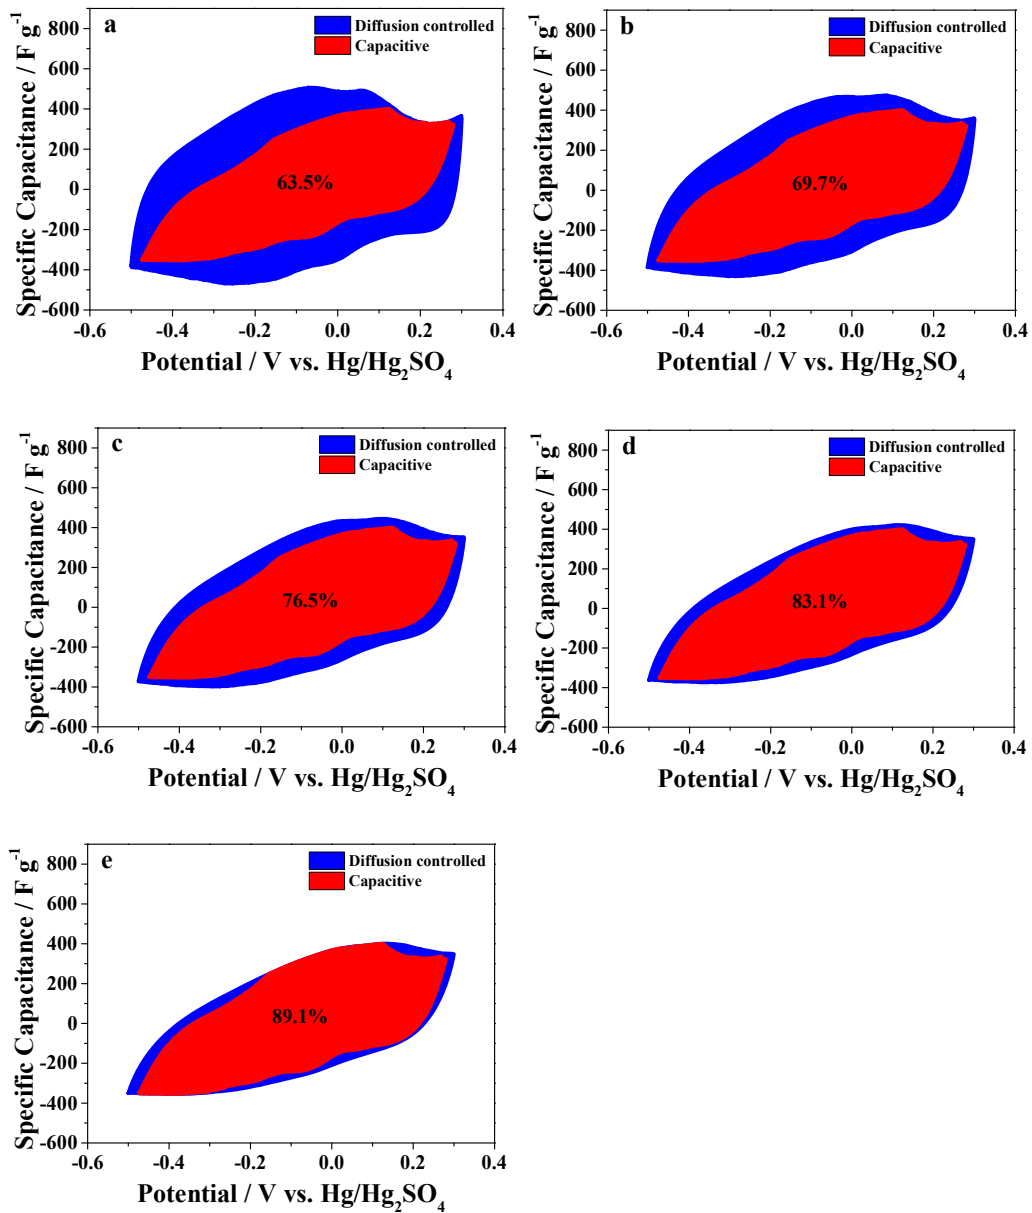

Fig. S7 The determination of capacitive contributions for PANI/H-Ti<sub>3</sub>C<sub>2</sub>T<sub>x</sub> at (a) 10, (b) 20, (c) 30, (d) 40 and (e) 50 mV s<sup>-1</sup>.

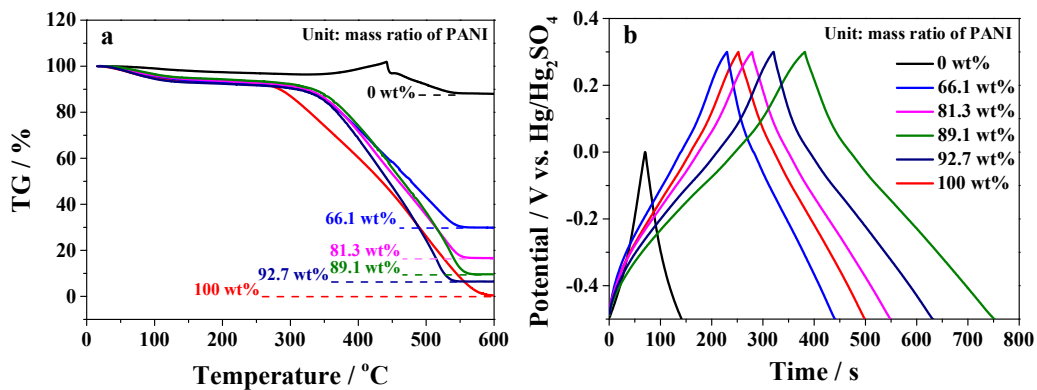

Fig. S8 The optimization of PANI/H-Ti<sub>3</sub>C<sub>2</sub>T<sub>x</sub> with different mass ratio of PANI in composites: (a) TG curves. (b) GCD curves.

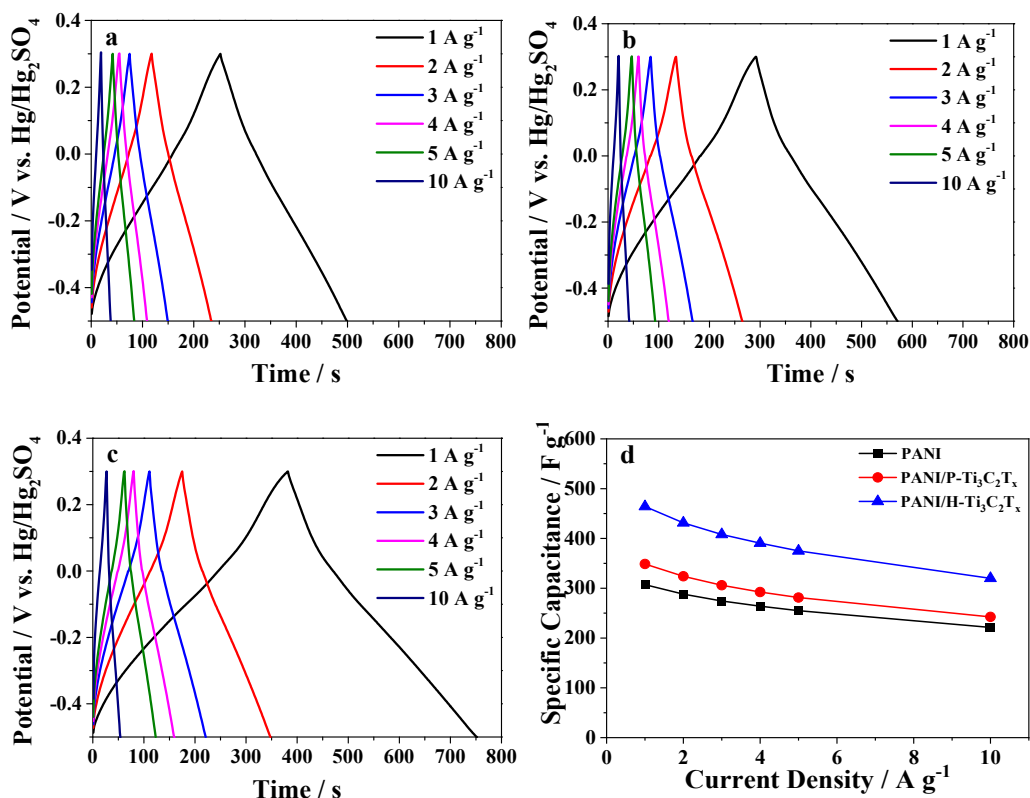

Fig. S9 Galvanostatic charge-discharge tests of PANI and PANI/Ti<sub>3</sub>C<sub>2</sub>T<sub>x</sub> at various current densities: (a) GCD curves of PANI. (b) GCD curves of PANI/P-Ti<sub>3</sub>C<sub>2</sub>T<sub>x</sub>. (c) GCD curves of PANI/H-Ti<sub>3</sub>C<sub>2</sub>T<sub>x</sub>. (d) Comparison of specific capacitances at different current densities.
